# Supplementary material for: Automated differentiation of acute encephalopathy with biphasic seizures and late reduced diffusion and prolonged febrile seizures in acute phase
Source: Research Square preprint supplement (doi:10.21203/rs.3.rs-6929044/v1), 2025-07-14
Supplement: Supplementary file 1 [file a3918f2cae9195bdadd3c100.docx]

| Supplementary Table S1. Absolute power spectrum values in AESD and PFS, overall and by brain region | | | | | | | | | | | | | | | |
| --- | --- | --- | --- | --- | --- | --- | --- | --- | --- | --- | --- | --- | --- | --- | --- |
| Electrode position | Frequency | AESD | | | | |  | | PFS | | |  | Ratio of mean APS values (AESD:PFS) | Q value | |
| Mean (SD) | | | | |  | | Mean (SD) | | |  |
| Overall | Delta | 747.01 | | | (1004.02) | |  | | 1941.01 | (2905.90) | |  | 0.38 | 0.05 | |
| Theta | 15.05 | | | (12.66) | |  | | 118.72 | (190.04) | |  | 0.13 | <0.01b | |
| Alpha | 1.89 | | | (0.84) | |  | | 29.43 | (61.25) | |  | 0.06 | <0.01a | |
| Beta | 0.50 | | | (0.50) | |  | | 14.38 | (24.63) | |  | 0.03 | <0.01a | |
| Gamma | 0.12 | | | (0.12) | |  | | 3.12 | (5.76) | |  | 0.04 | <0.01a | |
|  |  |  | | |  | |  | |  |  | |  |  |  | |
| Frontal | Delta | 599.78 | | | (933.88) | |  | | 1639.40 | (2785.23) | |  | 0.37 | 0.05 | |
| Theta | 9.82 | | | (7.87) | |  | | 89.04 | (139.90) | |  | 0.11 | <0.01b | |
| Alpha | 1.31 | | | (0.68) | |  | | 23.85 | (39.29) | |  | 0.05 | <0.01b | |
| Beta | 0.26 | | | (0.10) | |  | | 12.44 | (18.02) | |  | 0.02 | <0.01b | |
| Gamma | 0.08 | | | (0.06) | |  | | 3.72 | (6.64) | |  | 0.02 | <0.01a | |
|  |  |  | | |  | |  | |  |  | |  |  |  | |
| Centrotemporal | Delta | 1014.01 | | | (1551.80) | |  | | 2029.63 | (3121.23) | |  | 0.50 | 0.10 | |
| Theta | 21.00 | | | (24.19) | |  | | 171.82 | (485.59) | |  | 0.12 | 0.01 | |
| Alpha | 2.13 | | | (1.20) | |  | | 48.35 | (160.48) | |  | 0.04 | 0.02 | |
| Beta | 0.49 | | | (0.25) | |  | | 20.64 | (46.36) | |  | 0.02 | <0.01a | |
| Gamma | 0.12 | | | (0.10) | |  | | 5.14 | (15.65) | |  | 0.02 | 0.02 | |
|  |  |  | | |  | |  | |  |  | |  |  |  | |
| Parieto-occipital | Delta | 889.41 | | | (1083.43) | |  | | 2185.37 | (3201.90) | |  | 0.41 | 0.05 | |
| Theta | 23.03 | | | (27.66) | |  | | 107.42 | (163.11) | |  | 0.21 | <0.01b | |
| Alpha | 3.33 | | | (3.68) | |  | | 19.31 | (34.54) | |  | 0.17 | <0.01a | |
| Beta | 1.07 | | | (2.08) | |  | | 11.10 | (20.86) | |  | 0.10 | <0.01a | |
| Gamma | 0.23 | | | (0.28) | |  | | 1.92 | (3.82) | |  | 0.12 | <0.01a | |
| Abbreviations: AESD, acute encephalopathy with biphasic seizures and late reduced diffusion; APS, absolute power spectrum; PFS, prolonged febrile seizure; aQ < 0.01; bQ < 0.001 | | | | | | | | | | | | | | | |
|  | | | | | | | | | | | | | | | |
|  | | | | | | | | | | | | | | | |
|  |  |  | | |  | |  | |  |  | |  |  |  | |
| Supplementary Table S2. Correlations between results in EEG analysis and outcomes in patients with AESD | | | | | | | | | | | | | | |
|  | Frequency band | | *R* | *R*2 | | *P* value | | Beta coefficient | | | 95% confidence interval | | | |
| Lower limit | | Upper limit | |
| Mean absolute power spectrum value | Delta | | 0.11 | 0.01 | | 0.13 | | −0.11 | | | −400.5 | | 52.17 | |
| Theta | | 0.34 | 0.12 | | <0.01b | | −0.34 | | | −13.17 | | −5.82 | |
| Alpha | | 0.13 | 0.02 | | 0.06 | | −0.13 | | | −0.87 | | 0.01 | |
| Beta | | 0.08 | 0.01 | | 0.24 | | 0.08 | | | −0.08 | | 0.33 | |
| Gamma | | 0.17 | 0.03 | | 0.01a | | −0.17 | | | −0.08 | | −0.01 | |
|  |  | |  |  | |  | |  | | |  | |  | |
| Mean phase lag index value | Delta | | 0.10 | 0.01 | | <0.01b | | 0.10 | | | 0.01 | | 0.02 | |
| Theta | | 0.18 | 0.03 | | <0.01b | | −0.18 | | | −0.01 | | −0.01 | |
| Alpha | | 0.10 | 0.01 | | <0.01b | | −0.10 | | | −0.01 | | −0.01 | |
| Beta | | 0.01 | 0.01 | | 0.91 | | −0.01 | | | −0.01 | | 0.01 | |
| Gamma | | 0.21 | 0.04 | | <0.01b | | −0.21 | | | −0.02 | | −0.01 | |
| Abbreviations: AESD, acute encephalopathy with biphasic seizures and late reduced diffusion; EEG, electroencephalography; We performed multiple regression analyses; a*P* < 0.05; b*P* < 0.01. | | | | | | | | | | | | | | |
|  | | | | | | | | | | | | | | |
|  |  | |  |  | |  | |  | | |  | |  | |
